# Supplementary material for: A series of coordination compounds containing rigid multi-pyridine based ligands: syntheses, structures and properties
Source: Royal Society of Chemistry journal article supplement (doi:10.1039/c3ce41841c), 2014-01-01
Supplement: c3ce41841c.pdf [file c3ce41841c.pdf]

## Supporting Information

### **A series of coordination compounds containing rigid multi-pyridine based ligand: syntheses, structures and properties†**

**Hai-Ning Wang, Guo-Gang Shan, Hai-Bin Li, Xin-Long Wang\*, Hong-Tao Cao and Zhong-Min Su\***

*Institute of Functional Material Chemistry, Key Lab of Polyoxometalate Science of Ministry of Education, Faculty of Chemistry, Northeast Normal University, Changchun, 130024, People's Republic of China*

*E-mail address: [zmsu@nenu.edu.cn](mailto:zmsu@nenu.edu.cn); [wangxl824@nenu.edu.cn](mailto:wangxl824@nenu.edu.cn).*

*Tel.: (+86)-431-85099108.*

All reagents and solvents employed were commercially available and used as received without further purification. Elemental analyses (C, H, and N) were performed on a Perkin-Elmer 240C elemental analyzer. TG analyses were performed on a Perkin-Elmer TG-7 analyzer heated from 30 to 800 °C in a flow of nitrogen at the heating rate of 10 °C min<sup>-1</sup>. Powder X-ray diffraction (XRD) patterns of the samples were collected on a Rigaku Dmax 2000. <sup>1</sup>HNMR spectra were measured on Bruker Avance 500 MHz with tetramethylsilane as the internal standard. The solid state UV-vis absorption spectra were taken on a Cary 500 spectrophotometer while the liquid spectra were recorded on a Hitachi U3010 spectrometer. The emission spectra were recorded using a transient spectrofluorimeter (Edinburgh FLS920).

#### **The preparation of samples:**

The synthesized samples were collected, washed with water for six times, and dried overnight.

#### **The synthesis of 2,4,5-Tris(4-pyridinyl)-imidazole<sup>1</sup>**

A mixture of 4 g of 4-pyridinecarbaldehyde and 16 g of ammonium acetate was heated to 120 °C with stirring for 3 h. The reaction mixture was cooled, and then put into the water. The resulted precipitate was filtered off, and washed with water. Yield

2.0 g (50%).  $^1\text{H}$  NMR spectrum (500 MHz,  $\text{DMSO-}d_6$ ,  $\delta$  [ppm]): 7.5 (d,  $J = 6.0$  Hz, 4H,  $\text{C}_5\text{H}_4\text{N}$ ), 8.0 (d,  $J = 6.0$  Hz, 2H,  $\text{C}_5\text{H}_4\text{N}$ ), 8.6 (s, 4H,  $\text{C}_5\text{H}_4\text{N}$ ), 8.7 (d,  $J = 6.0$  Hz, 2H,  $\text{C}_5\text{H}_4\text{N}$ ). Elemental Anal. Calcd for  $\text{C}_{18}\text{H}_{13}\text{N}_5$  (%): C, 72.23; H, 4.38; N, 23.39. Found: C, 72.26; H, 4.34; N, 23.36%.

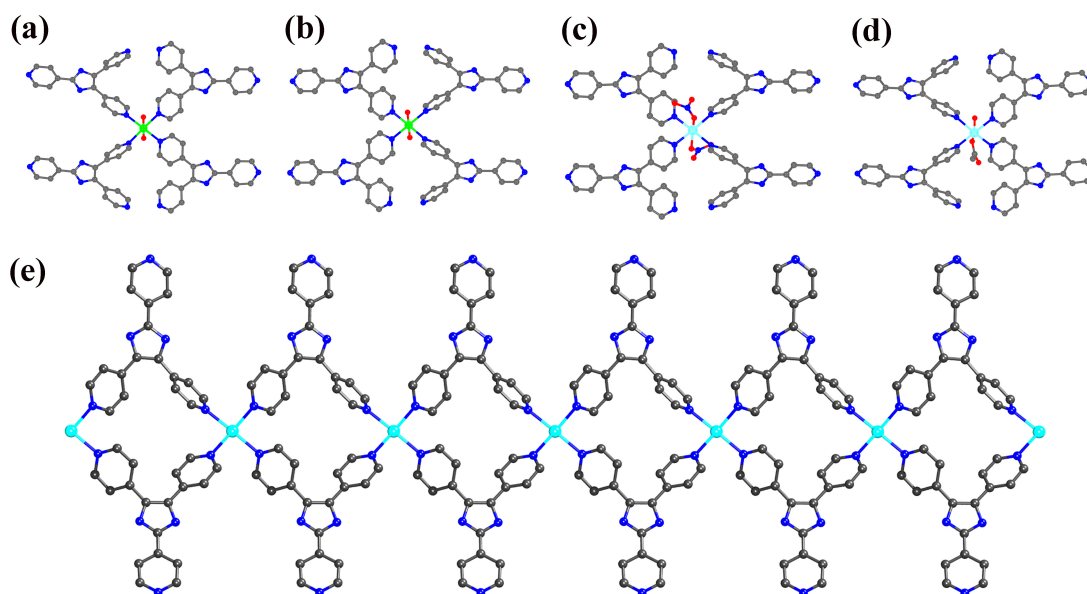

**Fig. S1** View of the coordination environments of M centers ( $\text{Zn}^{\text{II}}$  for **2** (a) and **3** (b),  $\text{Cd}^{\text{II}}$  for **4** (c) and **5** (d)). (e) The 1D chain structures. Lattice molecules, coordinated molecules and hydrogen atoms have been omitted for clarity.

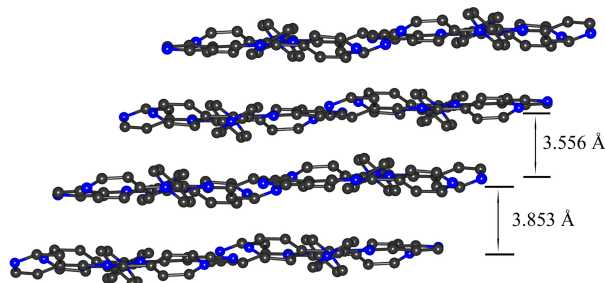

**Fig. S2** Crystal packing along *b* axis of compound **1**.

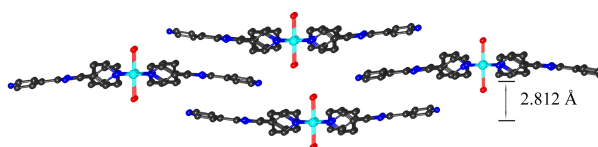

**Fig. S3** Crystal packing along *b* axis of compound **2**.

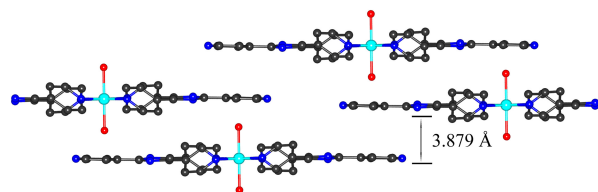

**Fig. S4** Crystal packing along *b* axis of compound **3**.

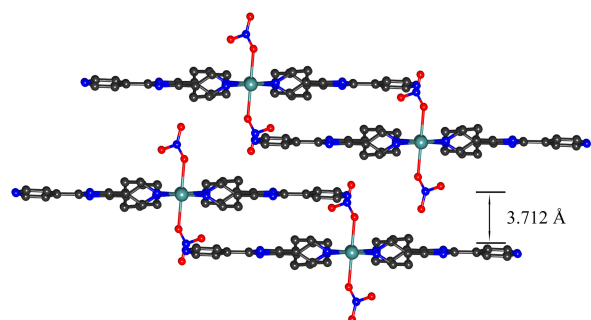

**Fig. S5** Crystal packing along *b* axis of compound 4.

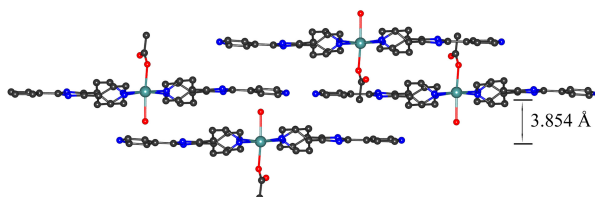

**Fig. S6** Crystal packing along *a* axis of compound 5.

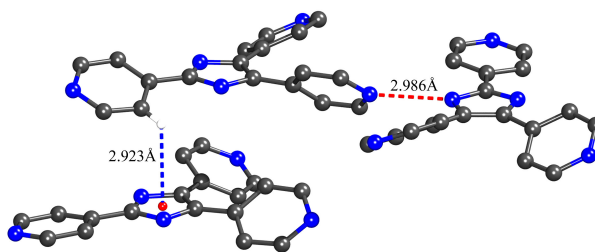

**Fig. S7** The intermolecular C-H... $\pi$  interactions and hydrogen bonds in compound 1.

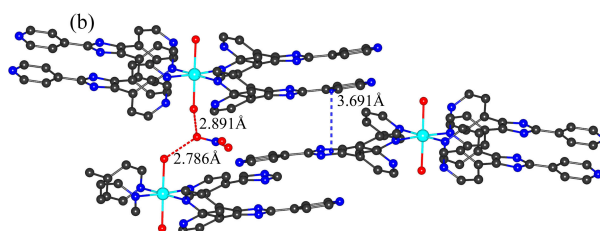

**Fig. S8** The intermolecular C-H... $\pi$  interactions and hydrogen bonds in compound 2.

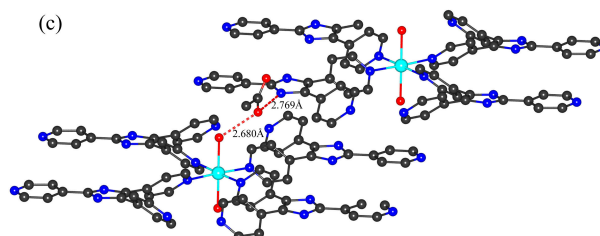

**Fig. S9** The intermolecular hydrogen bonds in compound 3.

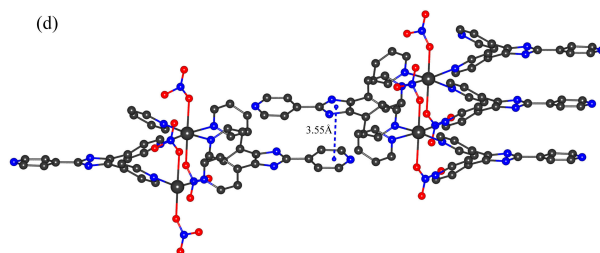

**Fig. S10** The intermolecular  $\pi \cdots \pi$  interaction in compound 4.

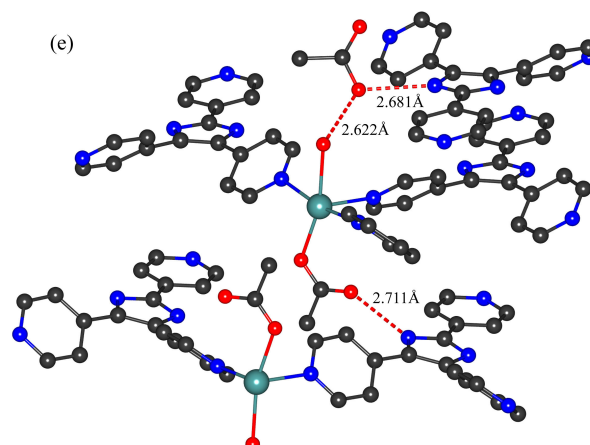

**Fig. S11** The intermolecular hydrogen bonds in compound 5.

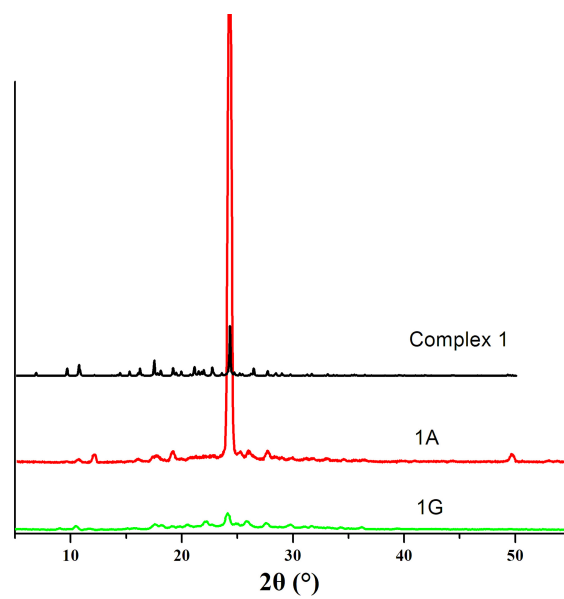

**Fig. S12** Power X-ray diffraction patterns of **1A** in different states.

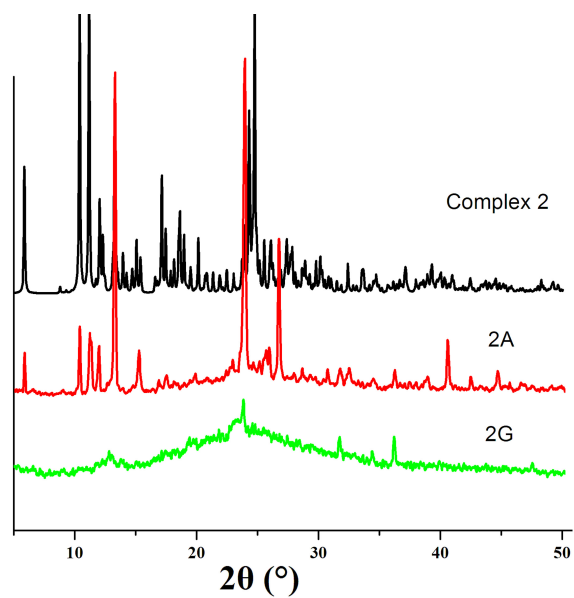

**Fig. S13** Power X-ray diffraction patterns of **2A** in different states.

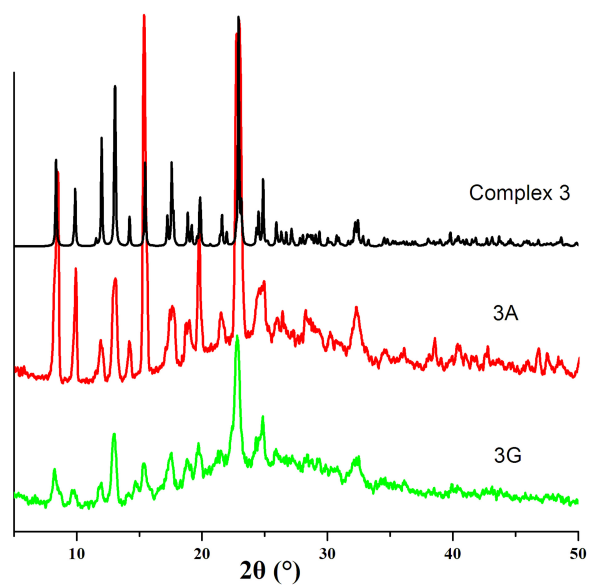

**Fig. S14** Power X-ray diffraction patterns of **3A** in different states.

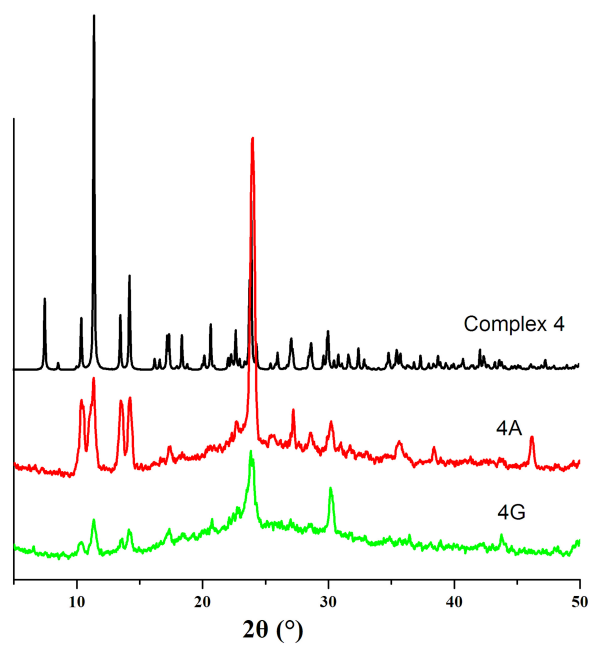

**Fig. S15** Power X-ray diffraction patterns of **4A** in different states.

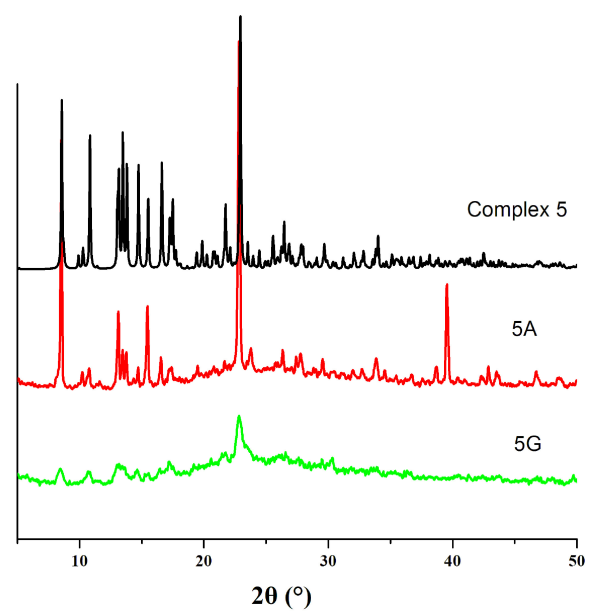

**Fig. S16** Power X-ray diffraction patterns of **5A** in different states.

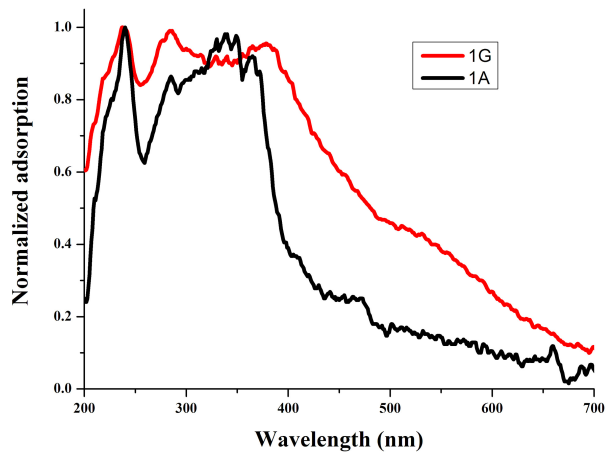

**Fig. S17** Solid-state absorption spectra of compound **1** before and after grinding.

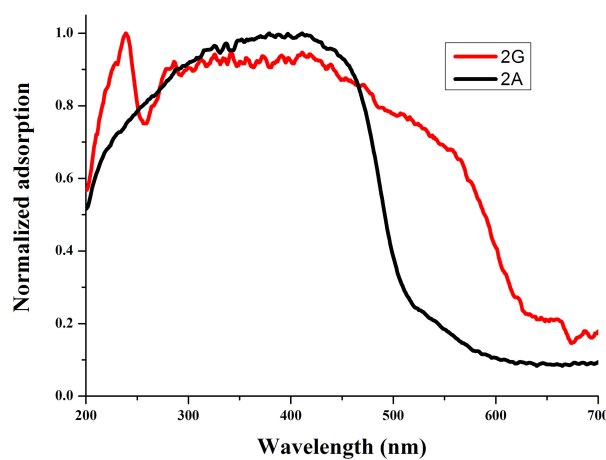

**Fig. S18** Solid-state absorption spectra of compound **2** before and after grinding.

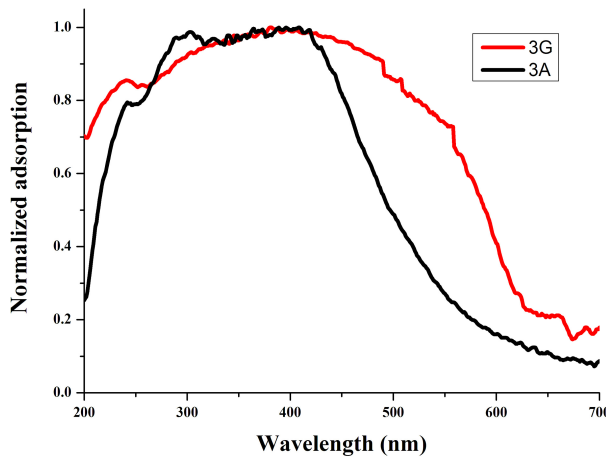

**Fig. S19** Solid-state absorption spectra of compound **3** before and after grinding.

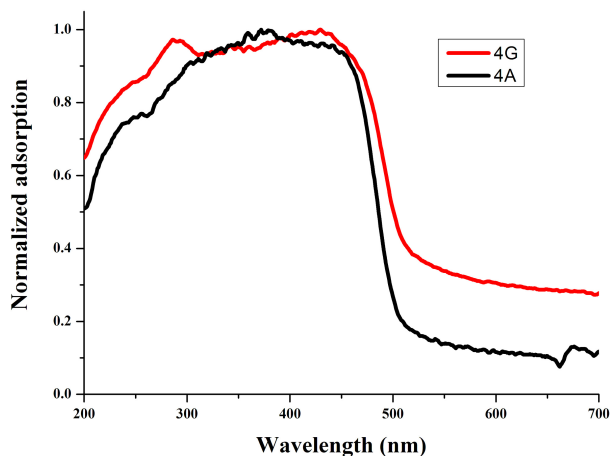

**Fig. S20** Solid-state absorption spectra of compound **4** before and after grinding.

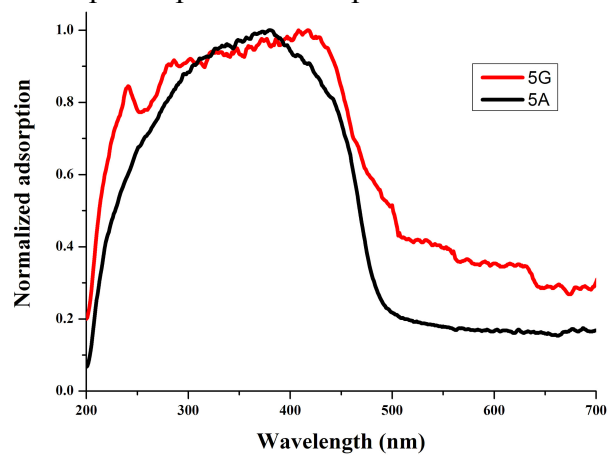

**Fig. S21** Solid-state absorption spectra of compound **5** before and after grinding.

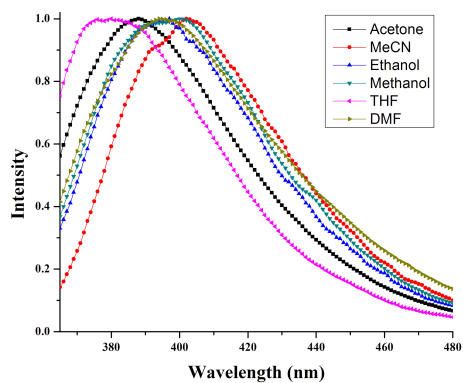

**Fig. S22** Normalized emission spectra of **1** in the various solvent at room temperature.

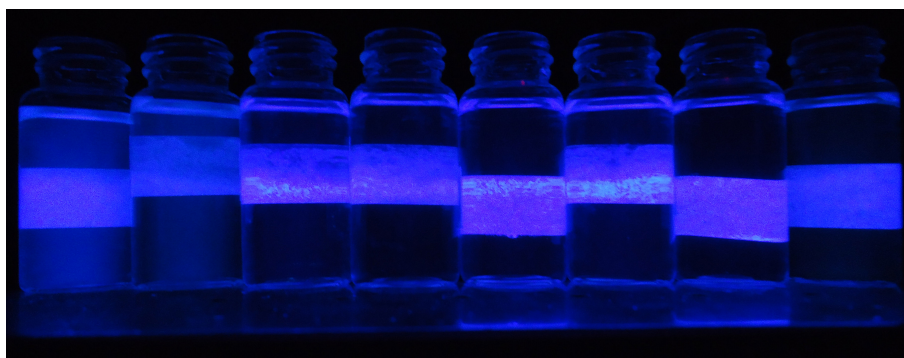



**Fig. S23** Luminescent photographs of compound **1** in DMF ( $3 \times 10^{-5}$  mol/L) in the presence of different metal ions ( $1 \times 10^{-4}$  mol/L) under 365 nm UV-light (left to right: DMF,  $\text{Hg}^{2+}$ ,  $\text{Zn}^{2+}$ ,  $\text{Cu}^{2+}$ ,  $\text{Co}^{2+}$ ,  $\text{Cd}^{2+}$ ,  $\text{Ni}^{2+}$ ,  $\text{Cr}^{3+}$ ).

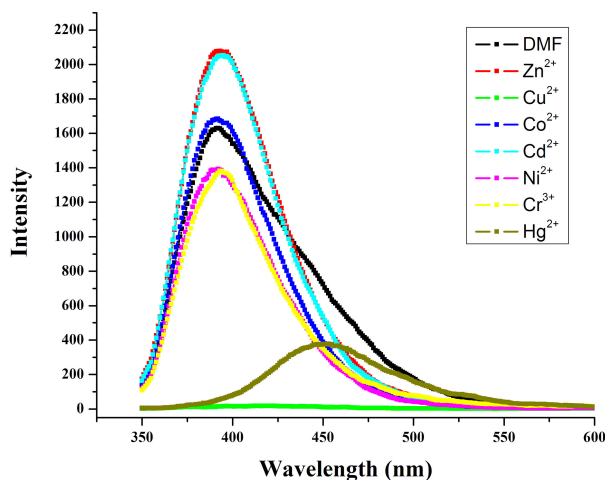

**Fig. S24** The emission spectra of compound **1** ( $3 \times 10^{-5}$  mol/L) in the DMF solvent containing different metal ions with concentration  $1 \times 10^{-4}$  mol/L at room temperature.

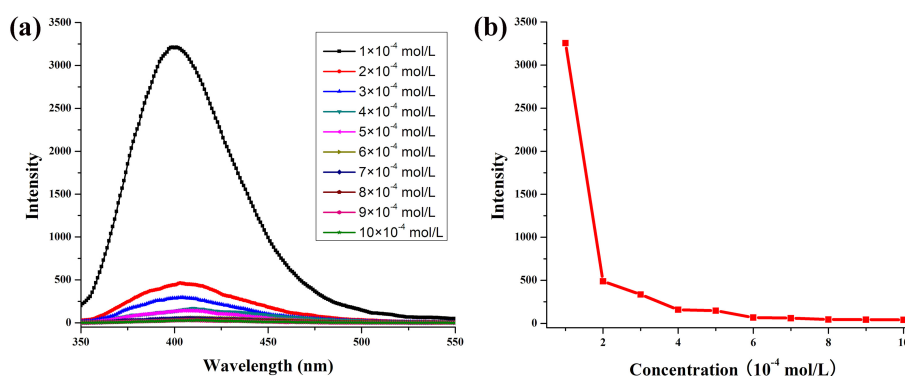

**Fig. S25** (a) The emission spectra of **1** ( $3 \times 10^{-5}$  mol/L) with  $\text{Cu}(\text{NO}_3)_2$  in DMF. [ $\text{Cu}^{2+}$ ]: 0.1, 0.2, 0.3, 0.4, 0.5, 0.6, 0.7, 0.8, 0.9,  $1 \times 10^{-3}$  mol/L. (b) Fluorescent intensity curve of a series of  $\text{Cu}(\text{NO}_3)_2$  DMF solution in the presence of compound **1**.

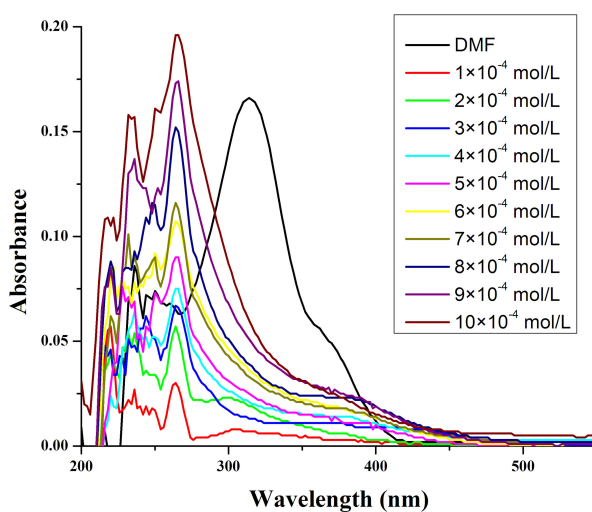

**Fig. S26** Absorption of **1** ( $3 \times 10^{-5}$  mol/L) in DMF solution with  $\text{Cu}(\text{NO}_3)_2$ . [ $\text{Cu}^{2+}$ ]: 0,

0.1, 0.2, 0.3, 0.4, 0.5, 0.6, 0.7, 0.8, 0.9,  $1 \times 10^{-3}$  mol/L.

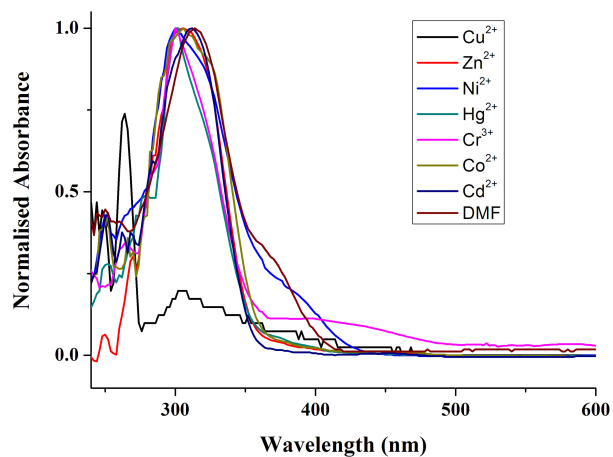

**Fig. S27** Normalized absorption of compound **1** in DMF ( $3 \times 10^{-5}$  mol/L) in the presence of different metal ions ( $1 \times 10^{-4}$  mol/L).

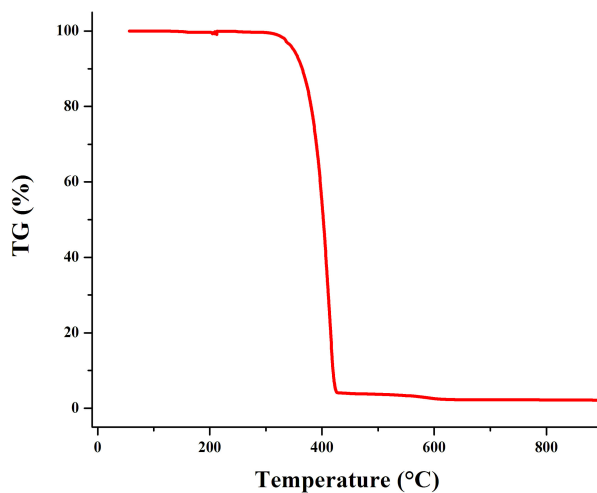

**Fig. S28** TG profile of **1**.

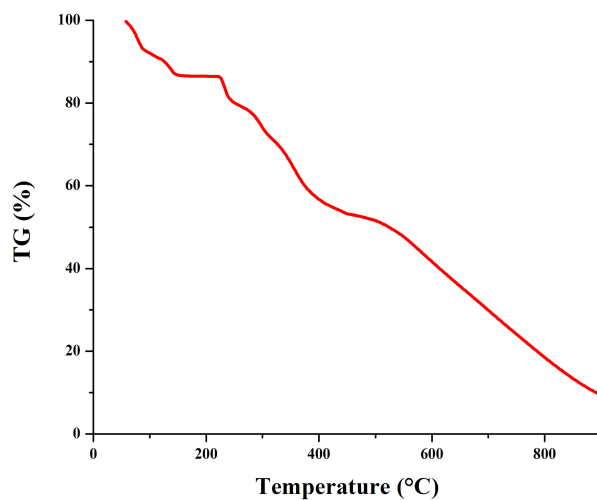

**Fig. S29** TG profile of **2**.

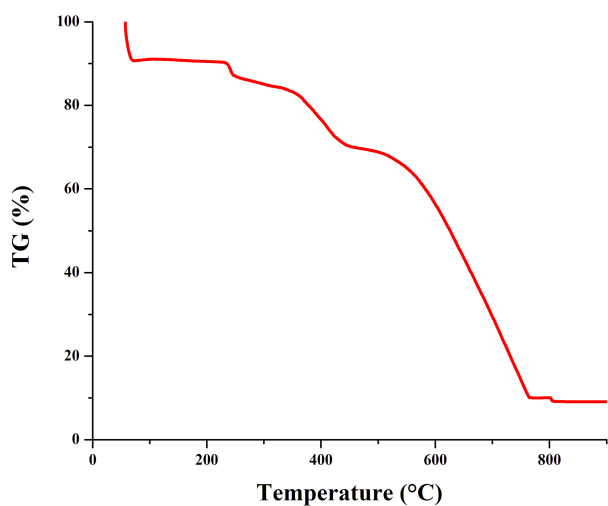

**Fig. S30** TG profile of **3**.

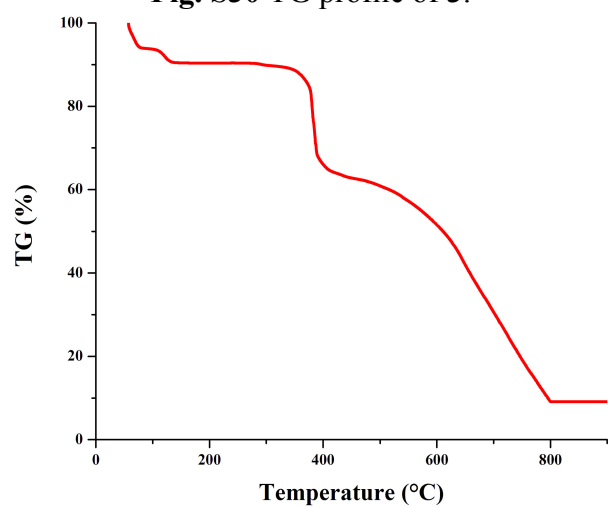

**Fig. S31** TG profile of **4**.

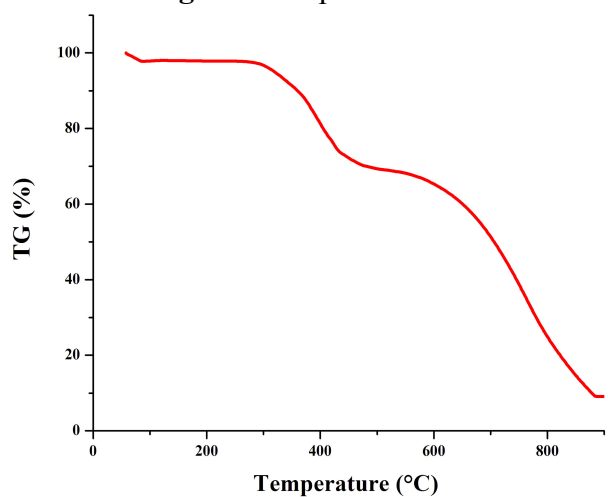

**Fig. S32** TG profile of **5**.

(1) Proskurnina, M. V.; Lozinskaya, N. A.; Tkachenko, S. E.; Zefirov, N. S. *Russ. J. Org. Chem.* **2002**, *38*, 1200.
